# Supplementary material for: Multilevel memristor effect in metal–semiconductor core–shell nanoparticles tested by scanning tunneling spectroscopy
Source: Royal Society of Chemistry journal article supplement (doi:10.1039/c5nr01161b), 2015-01-01
Supplement: c5nr01161b1.pdf [file c5nr01161b1.pdf]

## Supplementary Information

# Multilevel memristor effect in metal-semiconductor core-shell nanoparticles: tested by scanning tunneling spectroscopy

Sudipto Chakrabarti and Amlan J. Pal\*

Department of Solid State Physics, Indian Association for the Cultivation of Science, Jadavpur, Kolkata 700032, India.  
E-mail: sspajp@iacs.res.in; Fax: +91-33-24732805; Tel: +91-33-24734971

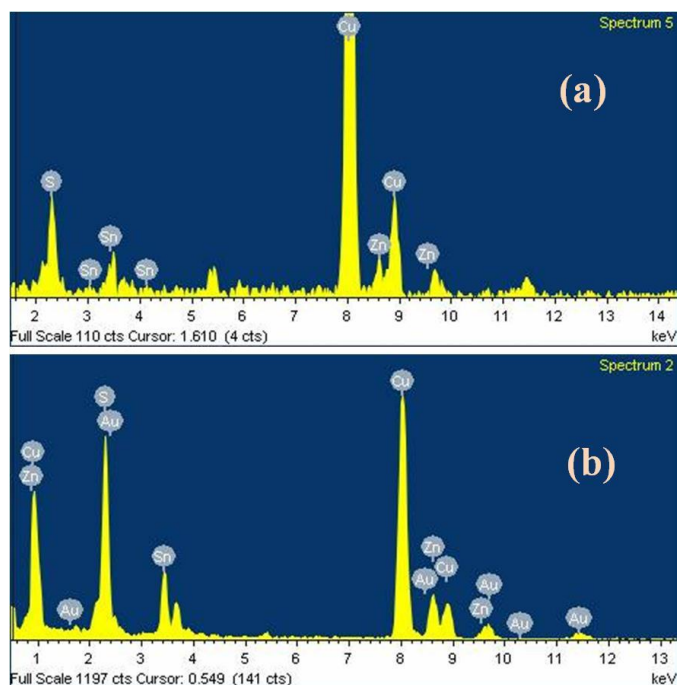

**Fig. S1.** EDX spectra of (a) CZTS nanocrystals and (b) Au-CZTS core-shell nanostructures.

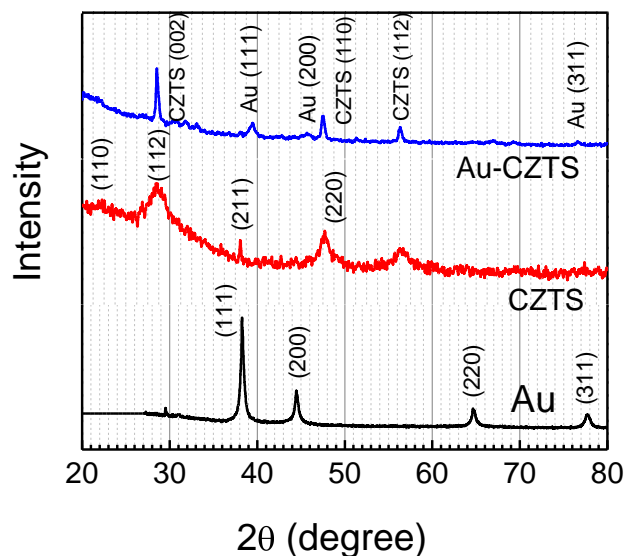

**Fig. S2.** XRD spectra of Au and CZTS nanocrystals and Au-CZTS core-shell nanostructures.

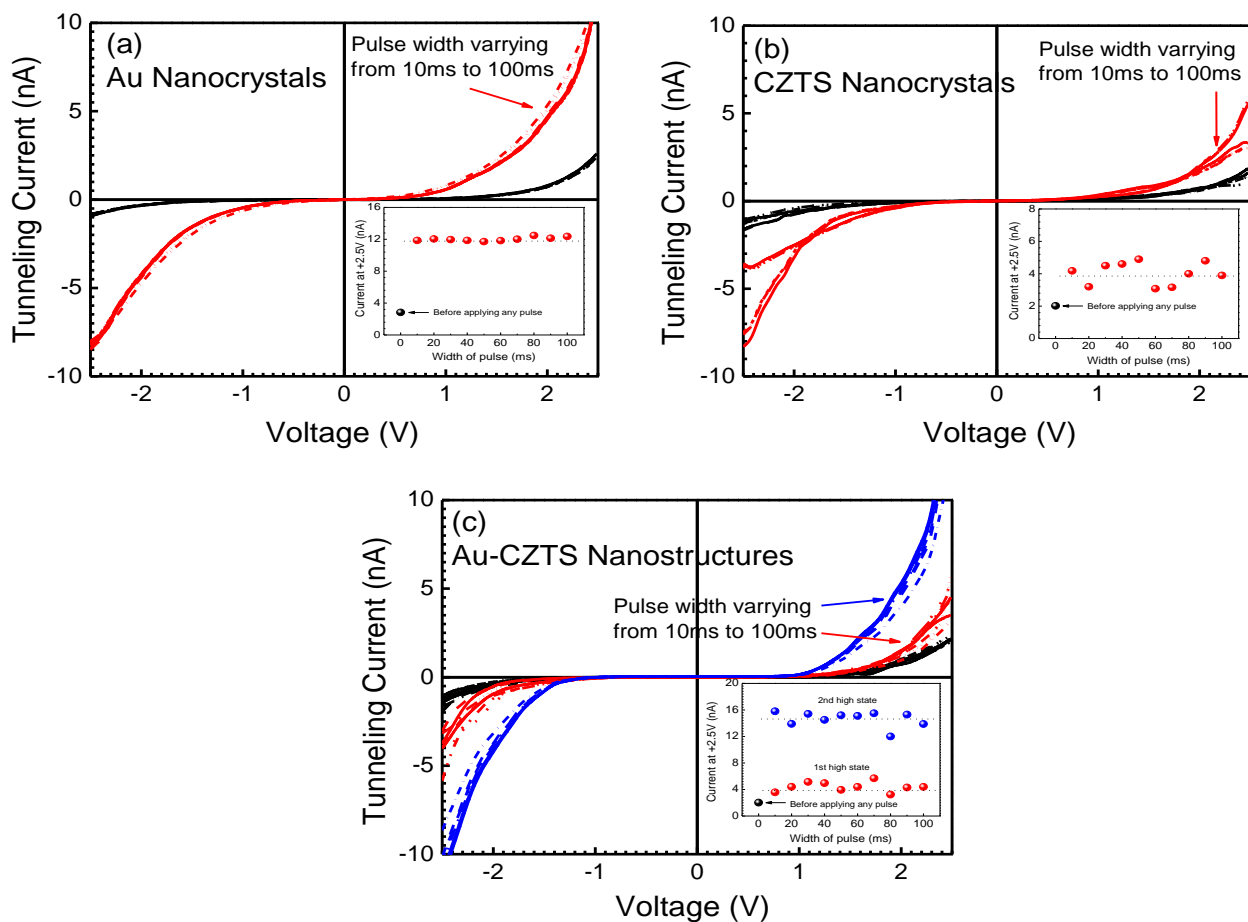

**Fig. S3.** Current-voltage characteristics of (a) gold, (b) CZTS nanocrystals and (c) Au-CZTS core-shell nanostructures after application of a voltage pulse of different pulse width (10-100 ms). A plot of current at +2.5 V as a function of the width of voltage pulse that preceded the measurement of tunneling current versus voltage characteristics is shown in the inset of each of the plots.

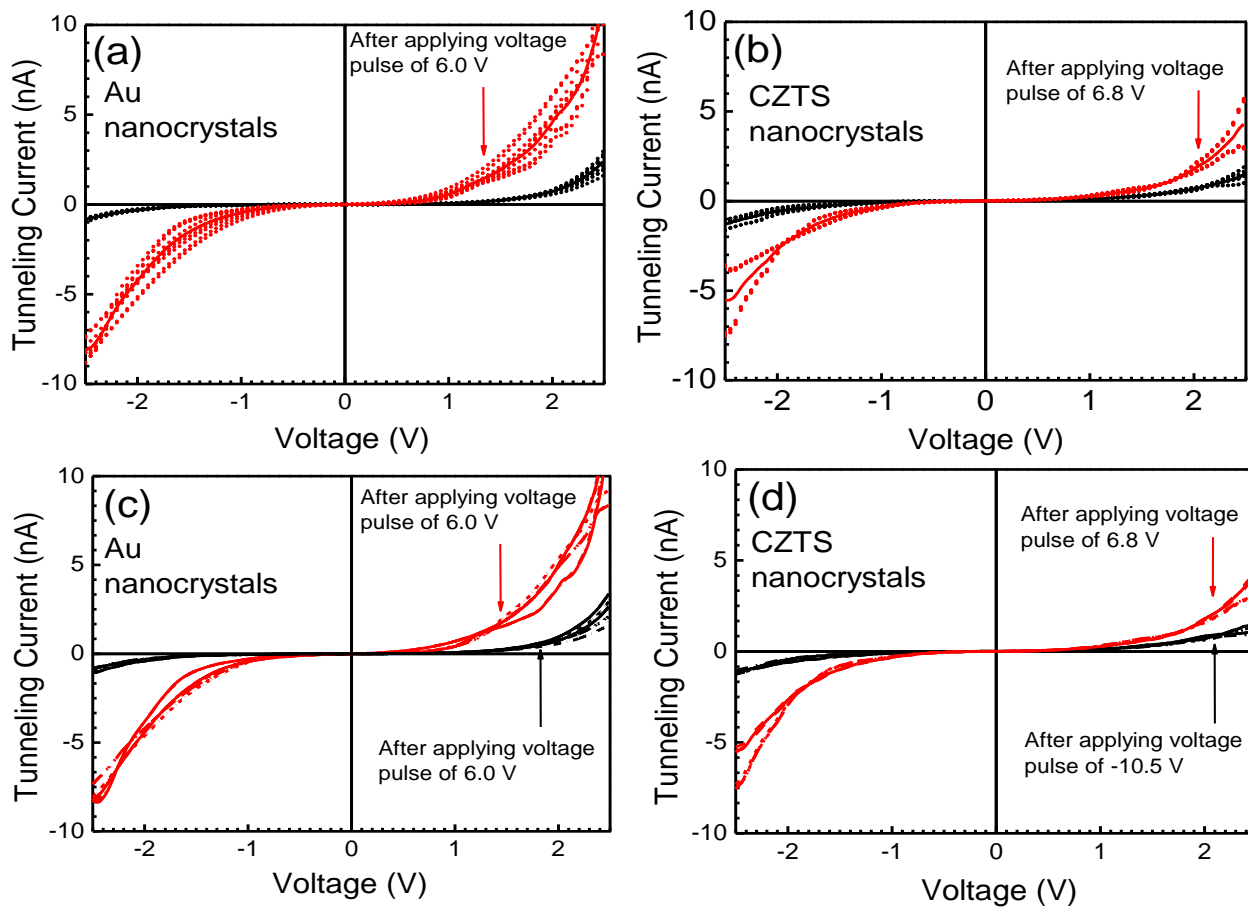

**Fig. S4.** Current-voltage characteristics of (a) Au and (b) CZTS nanocrystals before and after application of a positive voltage pulse (6.0 V and 6.8 V, respectively). Current-voltage characteristics of (a) Au and (b) CZTS nanocrystals after application of a positive (+6.0 and +6.8 V, respectively) and a negative voltage (-10.5 V) pulse in cycles.

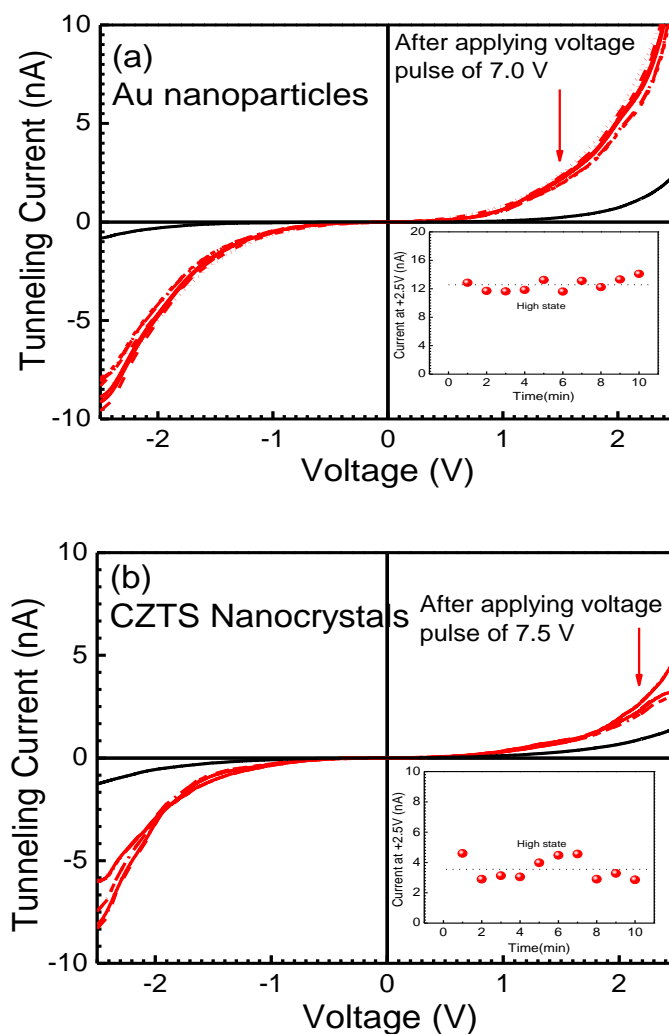

**Fig. S5.** Current-voltage characteristics of (a) Au and (b) CZTS core nanoparticles after application of a positive voltage pulse (+7.0 and +7.5 V, respectively). Characteristics were recorded for 10 times, after a minute each. *I-V* characteristics before application of the voltage pulse are also shown. A plot of current at +2.5 V (as obtained from the *I-V* characteristics) as a function of time is shown in the inset of the figures.
